# Supplementary material for: Return to play? Athletes with congenital long QT syndrome
Source: HighWire-hosted journal article supplement (doi:10.1136/bjsports-2012-091751), 2012-11-28
Supplement: bjsports-2012-091751supp_tables.pdf [file bjsports-2012-091751supp_tables.pdf]

**Supplemental Table 1: Specific Patient Information – Against ESC but Within Bethesda Conference Guidelines**

| Pt # | Gender | Age at Dx (years) | Genotype | QTc at Dx (ms) | Symptoms | ICD | Beta-Blocker | LCSD | Bethesda Sport Class | Level      | Events During Sport? |
|------|--------|-------------------|----------|----------------|----------|-----|--------------|------|----------------------|------------|----------------------|
| 1    | M      | 15                | LQT1     | 412            | N        | N   | Y            | N    | IA                   | HS         | N                    |
| 2    | F      | 3                 | LQT1     | 465            | N        | N   | Y            | N    | IIB                  | Other      | N                    |
| 3    | M      | 9                 | LQT1     | 420            | N        | N   | Y            | N    | IA                   | HS         | N                    |
| 4    | M      | 1                 | LQT1     | 460            | N        | N   | N            | N    | IB                   | Child Comp | N                    |
| 5    | M      | 15                | LQT1     | 443            | N        | N   | Y            | N    | IIIB                 | HS         | N                    |
| 6    | M      | 14                | LQT1     | 420            | N        | N   | Y            | Y    | IIC                  | HS         | N                    |
| 7    | M      | 11                | LQT1     | 440            | N        | N   | Y            | N    | IIB                  | HS         | N                    |
| 8    | M      | 16                | LQT1     | 459            | N        | N   | Y            | N    | IIB                  | College    | N                    |
| 9    | M      | 9                 | LQT1     | 427            | N        | N   | Y            | N    | IC                   | Child Comp | N                    |
| 10   | M      | 6                 | LQT1     | 444            | N        | N   | Y            | N    | IIC                  | Child Comp | N                    |
| 11   | F      | 4                 | LQT1     | 452            | N        | N   | Y            | N    | IC                   | Child Comp | N                    |
| 12   | F      | 17                | LQT1     | 440            | N        | N   | Y            | N    | IB                   | College    | N                    |
| 13   | M      | 9                 | LQT1     | 458            | N        | N   | Y            | N    | IIIA                 | Child Comp | N                    |
| 14   | F      | 2                 | LQT1     | 458            | N        | N   | Y            | N    | IIIA                 | Child Comp | N                    |
| 15   | M      | 7                 | LQT1     | 390            | N        | N   | Y            | N    | IIC                  | Child Comp | N                    |
| 16   | M      | 5                 | LQT1     | 429            | N        | N   | Y            | N    | IIC                  | Child Comp | N                    |
| 17   | M      | 11                | LQT1     | 450            | N        | N   | Y            | N    | IB                   | Child Comp | N                    |
| 18   | F      | 16                | LQT1     | 440            | N        | N   | N            | Y    | IC                   | HS         | N                    |
| 19   | M      | 6                 | LQT1     | 416            | N        | N   | Y            | N    | IB                   | Child Comp | N                    |
| 20   | M      | 14                | LQT1     | 414            | N        | N   | Y            | N    | IC                   | Child Comp | N                    |
| 21   | F      | 28                | LQT1     | 450            | N        | N   | Y            | N    | IC                   | Adult Comp | N                    |
| 22   | M      | 7                 | LQT1     | 459            | N        | N   | Y            | N    | IIIA                 | Child Comp | N                    |
| 23   | F      | 7                 | LQT1     | 438            | N        | N   | Y            | N    | IIB                  | Other      | N                    |
| 24   | M      | 25                | LQT1     | 430            | N        | N   | N            | N    | IC                   | Adult Comp | N                    |
| 25   | M      | 8                 | LQT1     | 501            | Y        | N   | Y            | N    | IA                   | Child Comp | N                    |
| 26   | F      | 35                | LQT1     | 449            | N        | N   | Y            | N    | IIIA                 | Adult Comp | N                    |
| 27   | F      | 13                | LQT1     | 471            | N        | N   | Y            | N    | IC                   | HS         | N                    |
| 28   | F      | 2                 | LQT1     | 425            | N        | N   | Y            | N    | IC                   | Child Comp | N                    |
| 29   | F      | 9                 | LQT1     | 460            | N        | N   | Y            | N    | IIC                  | Child Comp | N                    |

|    |   |    |      |     |   |   |   |   |      |            |   |
|----|---|----|------|-----|---|---|---|---|------|------------|---|
| 30 | F | 9  | LQT1 | 432 | N | N | Y | N | IIIA | Child Comp | N |
| 31 | M | 8  | LQT1 | 432 | N | N | Y | N | IIB  | Child Comp | N |
| 32 | M | 12 | LQT1 | 448 | N | N | Y | N | IB   | Child Comp | N |
| 33 | F | 6  | LQT1 | 456 | N | N | Y | N | IIIA | HS         | N |
| 34 | M | 9  | LQT1 | 413 | N | N | Y | N | IC   | Child Comp | N |
| 35 | M | 7  | LQT1 | 436 | N | N | Y | N | IIC  | Child Comp | N |
| 36 | M | 32 | LQT1 | 419 | N | N | Y | N | IIC  | Adult Comp | N |
| 37 | M | 2  | LQT1 | 417 | N | N | Y | N | IIC  | Child Comp | N |
| 38 | F | 14 | LQT1 | 470 | N | N | Y | N | IIIA | Child Comp | N |
| 39 | F | 14 | LQT1 | 440 | N | N | Y | Y | IIC  | HS         | N |
| 40 | M | 12 | LQT1 | 434 | N | N | Y | N | IIC  | Child Comp | N |
| 41 | M | 18 | LQT1 | 451 | N | N | Y | N | IB   | College    | N |
| 42 | M | 10 | LQT2 | 441 | N | N | Y | N | IIC  | Child Comp | N |
| 43 | M | 4  | LQT2 | 440 | N | N | Y | N | IIB  | Other      | N |
| 44 | F | 17 | LQT2 | 462 | N | N | Y | N | IIIA | Child Comp | N |
| 45 | F | 12 | LQT2 | 473 | N | N | Y | N | IC   | Child Comp | N |
| 46 | M | 10 | LQT2 | 396 | N | N | Y | N | IC   | HS         | N |
| 47 | M | 12 | LQT2 | 428 | N | N | Y | N | IC   | HS         | N |
| 48 | M | 12 | LQT2 | 438 | N | N | Y | N | IIC  | HS         | N |
| 49 | F | 14 | LQT2 | 463 | N | N | Y | N | IB   | HS         | N |
| 50 | F | 3  | LQT2 | 414 | N | N | Y | N | IIC  | Child Comp | N |
| 51 | M | 1  | LQT2 | 423 | N | N | Y | N | IIB  | Child Comp | N |
| 52 | F | 12 | LQT2 | 465 | N | N | Y | N | IB   | HS         | N |
| 53 | M | 14 | LQT2 | 447 | N | N | Y | N | IIC  | Child Comp | N |
| 54 | F | 10 | LQT2 | 460 | N | N | N | Y | IIB  | Other      | N |
| 55 | F | 12 | LQT2 | 440 | N | N | Y | N | IIIA | Child Comp | N |
| 56 | M | 10 | LQT2 | 451 | N | N | Y | N | IIC  | Child Comp | N |
| 57 | M | 17 | LQT2 | 433 | N | N | N | N | IIB  | College    | N |
| 58 | F | 16 | LQT2 | 460 | N | N | Y | N | IB   | College    | N |
| 59 | M | 5  | LQT2 | 450 | N | N | Y | N | IB   | Child Comp | N |
| 60 | M | 9  | LQT2 | 444 | N | N | Y | N | IB   | Child Comp | N |
| 61 | F | 7  | LQT2 | 425 | N | N | N | N | IIIA | Child Comp | N |
| 62 | M | 8  | LQT3 | 450 | N | N | N | N | IC   | Child Comp | N |

|    |   |    |                   |     |   |   |   |   |      |            |   |
|----|---|----|-------------------|-----|---|---|---|---|------|------------|---|
| 63 | M | 16 | LQT3              | 465 | N | N | N | N | IC   | HS         | N |
| 64 | M | 11 | LQT3              | 430 | N | N | N | N | IIC  | Child Comp | N |
| 65 | M | 16 | LQT3              | 517 | N | N | N | N | IIB  | HS         | N |
| 66 | F | 11 | LQT3              | 475 | N | N | N | N | IIC  | Child Comp | N |
| 67 | F | 5  | LQT3              | 475 | N | N | N | N | IB   | Child Comp | N |
| 68 | F | 5  | LQT3              | 496 | N | N | N | N | IB   | Child Comp | N |
| 69 | F | 15 | LQT3              | 414 | N | N | N | N | IIIA | College    | N |
| 70 | F | 7  | Multiple<br>(1&2) | 472 | N | N | Y | Y | IC   | Child Comp | N |

**Supplemental Table 2: Specific Patient Information – Against Bethesda Guidelines**

| Pt #     | Gender   | Age at Dx (years) | Genotype    | QTc at Dx (ms) | Symptoms | ICD      | Beta-Blocker | LCSD     | Bethesda Sport Class | Level             | Events During Sport? |
|----------|----------|-------------------|-------------|----------------|----------|----------|--------------|----------|----------------------|-------------------|----------------------|
| 1        | M        | 4                 | LQT1        | 650            | Y        | Y        | Y            | Y        | IC                   | Child Comp        | N                    |
| 2        | M        | 2                 | LQT1        | 487            | N        | N        | Y            | N        | IC                   | Child Comp        | N                    |
| 3        | M        | 5                 | LQT1        | 500            | N        | N        | Y            | Y        | IB                   | Child Comp        | N                    |
| 4        | M        | 9                 | LQT1        | 422            | Y        | Y        | Y            | N        | IIC                  | HS                | N                    |
| 5        | M        | 10                | LQT1        | 468            | Y        | N        | Y            | N        | IIIB                 | HS                | N                    |
| <b>6</b> | <b>M</b> | <b>7</b>          | <b>LQT1</b> | <b>490</b>     | <b>Y</b> | <b>Y</b> | <b>Y</b>     | <b>Y</b> | <b>IIC</b>           | <b>Child Comp</b> | <b>Y</b>             |
| 7**      | F        | 9                 | LQT1        | 431            | N        | N        | Y            | N        | IIIB                 | Child Comp        | N                    |
| 8        | F        | 7                 | LQT1        | 480            | N        | N        | Y            | N        | IB                   | Child Comp        | N                    |
| 9        | F        | 0                 | LQT1        | 526            | N        | N        | Y            | N        | IIIA                 | Child Comp        | N                    |
| 10       | M        | 11                | LQT1        | 478            | N        | N        | N            | Y        | IB                   | Child Comp        | N                    |
| 11       | F        | 14                | LQT1        | 520            | Y        | N        | Y            | N        | IC                   | Adult Comp        | N                    |
| 12       | M        | 14                | LQT1        | 450            | Y        | N        | Y            | Y        | IIC                  | HS                | N                    |
| 13       | F        | 36                | LQT1        | 490            | Y        | Y        | Y            | N        | IC                   | Adult Comp        | N                    |
| 14       | M        | 33                | LQT1        | 422            | N        | Y        | Y            | N        | IIIA                 | Adult Comp        | N                    |
| 15       | M        | 6                 | LQT1        | 480            | Y        | N        | Y            | N        | IIC                  | Child Comp        | N                    |
| 16       | M        | 12                | LQT1        | 492            | N        | N        | Y            | N        | IIC                  | Child Comp        | N                    |
| 17       | M        | 13                | LQT1        | 541            | N        | N        | Y            | N        | IIB                  | HS                | N                    |
| 18       | F        | 15                | LQT1        | 512            | N        | N        | Y            | N        | IIIA                 | Child Comp        | N                    |
| 19       | M        | 11                | LQT1        | 475            | N        | N        | Y            | N        | IIC                  | Child Comp        | N                    |
| 20       | M        | 9                 | LQT1        | 470            | N        | N        | Y            | N        | IIC                  | Child Comp        | N                    |
| 21       | F        | 10                | LQT1        | 510            | N        | N        | Y            | Y        | IIC                  | Nat'l             | N                    |
| 22       | F        | 16                | LQT1        | 486            | Y        | N        | Y            | Y        | IIC                  | HS                | N                    |
| 23       | M        | 5                 | LQT1        | 492            | N        | N        | Y            | N        | IIIA                 | Child Comp        | N                    |
| 24       | F        | 10                | LQT1        | 501            | N        | N        | Y            | N        | IC                   | HS                | N                    |
| 25       | M        | 10                | LQT1        | 483            | N        | N        | Y            | N        | IIC                  | Child Comp        | N                    |
| 26       | F        | 15                | LQT1        | 505            | N        | N        | Y            | Y        | IIB                  | HS                | N                    |
| 27       | M        | 8                 | LQT1        | 486            | Y        | N        | Y            | N        | IIC                  | Child Comp        | N                    |
| 28       | F        | 11                | LQT1        | 483            | N        | N        | Y            | N        | IB                   | Child Comp        | N                    |
| 29       | F        | 35                | LQT1        | 510            | N        | N        | Y            | N        | IIIA                 | Adult Comp        | N                    |

|    |   |    |                |     |   |   |   |   |      |            |   |
|----|---|----|----------------|-----|---|---|---|---|------|------------|---|
| 30 | F | 16 | LQT1           | 510 | N | N | Y | Y | IC   | HS         | N |
| 31 | M | 13 | LQT1           | 450 | Y | N | Y | Y | IB   | HS         | N |
| 32 | F | 4  | LQT1           | 503 | Y | N | Y | N | IIIA | Child Comp | N |
| 33 | F | 16 | LQT1           | 480 | N | N | Y | N | IIIA | Child Comp | N |
| 34 | F | 13 | LQT2           | 500 | Y | Y | Y | N | IB   | HS         | N |
| 35 | F | 14 | LQT2           | 490 | Y | N | Y | N | IIIA | Child Comp | N |
| 36 | M | 12 | LQT2           | 517 | N | N | Y | N | IIB  | Child Comp | N |
| 37 | F | 17 | LQT2           | 530 | Y | Y | Y | Y | IIIA | Child Comp | N |
| 38 | F | 14 | LQT2           | 560 | N | N | Y | Y | IB   | HS         | N |
| 39 | F | 12 | LQT2           | 550 | N | N | Y | N | IB   | Child Comp | N |
| 40 | F | 15 | LQT2           | 490 | N | Y | Y | N | IIIA | Child Comp | N |
| 41 | F | 14 | LQT2           | 599 | Y | Y | Y | N | IIIA | Child Comp | N |
| 42 | M | 0  | LQT2           | 480 | N | N | Y | N | IIB  | Child Comp | N |
| 43 | M | 10 | LQT2           | 511 | Y | Y | Y | N | IIB  | Other      | N |
| 44 | F | 15 | LQT2           | 447 | Y | Y | Y | N | IIC  | Child Comp | N |
| 45 | M | 1  | LQT2           | 475 | N | N | Y | N | IIC  | Child Comp | N |
| 46 | M | 16 | LQT2           | 524 | N | Y | Y | N | IC   | Adult Comp | N |
| 47 | F | 13 | LQT2           | 540 | Y | Y | Y | Y | IC   | HS         | N |
| 48 | M | 9  | LQT2           | 490 | N | N | Y | N | IIC  | Child Comp | N |
| 49 | M | 11 | LQT2           | 493 | Y | N | Y | N | IIC  | Child Comp | N |
| 50 | M | 6  | LQT2           | 583 | Y | Y | Y | N | IIIA | HS         | N |
| 51 | F | 17 | LQT2           | 463 | Y | N | Y | N | IIIA | Adult Comp | N |
| 52 | F | 24 | LQT2           | 613 | Y | Y | Y | N | IC   | Adult Comp | N |
| 53 | F | 13 | LQT2           | 574 | N | Y | Y | N | IIC  | Child Comp | N |
| 54 | F | 16 | LQT2           | 440 | Y | N | Y | N | IC   | HS         | N |
| 55 | M | 15 | LQT3           | 464 | Y | Y | N | N | IC   | Child Comp | N |
| 56 | M | 2  | LQT3           | 474 | Y | Y | N | N | IIC  | Child Comp | N |
| 57 | F | 13 | LQT3           | 475 | N | Y | Y | N | IB   | HS         | N |
| 58 | F | 14 | Multiple (1&2) | 600 | Y | Y | Y | N | IIIA | HS         | N |
| 59 | M | 1  | Multiple (1&2) | 567 | N | N | Y | Y | IC   | Child Comp | N |
| 60 | F | 18 | Multiple (1&3) | 456 | Y | N | Y | Y | IC   | College    | N |
